# Supplementary material for: Bikeability cycle training: a route to increasing young people’s subjective wellbeing? A retrospective cohort study
Source: BMC Public Health. 2025 Aug 18;25:2826. doi: 10.1186/s12889-025-23838-2 (PMC12359844; doi:10.1186/s12889-025-23838-2)
Supplement: Supplementary file 2 — Supplementary Material 2. [file 12889_2025_23838_MOESM2_ESM.xlsx]

## Sheet: DATA - 240325
	2. PARENT/CARER: Please type your name below. Thank you.	3. Please select today's date. Thank you.	4. PARENT/CARER: please type your name one more time below:	5. PARENT/CARER: please type your preferred contact email address [NB: please ensure this is correct for entry into the prize draw]:	6. PARENT/CARER: please type your preferred contact telephone number [NB: please ensure this is correct too, for contact purposes]:	7. PARENT/CARER: please type your age in years:	8. PARENT/CARER: please indicate your gender using the following options:	9. PARENT/CARER: do you have a PHYSICAL impairment that has a substantial and long-term negative effect on your ability to do normal activities?	10. PARENT/CARER: do you have a MENTAL impairment that has a substantial and long-term negative effect on your ability to do normal activities?	11. PARENT/CARER: have you had formal cycle training?PLEASE SELECT ALL THAT APPLY	PARENT_CYCLE_TRAINING_CODE	12. YOUNG PERSON: How old are you, in years?	13. YOUNG PERSON: Please identify your gender using the options below:	14. YOUNG PERSON: Do you have a PHYSICAL impairment that has a substantial and long-term negative effect on your ability to do normal activities?	15. YOUNG PERSON: Do you have a MENTAL impairment that has a substantial and long-term negative effect on your ability to do normal activities?	16. YOUNG PERSON: Are you in paid employment?	17. How many hours per week do you work in your job(s)?	18. How do you get to your place of work?PLEASE INDICATE THE FREQUENCY WITH WHICH YOU USE EACH MODE OF TRAVEL.	18.1. Walk	18.2. Drive/driven by someone	18.3. Public transport	18.4. Cycle	19. YOUNG PERSON: Did you complete Bikeability Level 2 training when at primary school (training in which you went on roads with your classmates and one or two instructors)?	BIKEABILITY_L2_CODE	20. Why did you not complete Bikeability Level 2 training?	21. Can you ride a cycle?	22. Do you have access to a working cycle?	23. YOUNG PERSON:Please indicate how frequently you make journeys by...	23.1. ...car/van	23.2. ...motorcycle/moped	23.3. ...bus/tram	23.4. ...train	23.5. ...cycling (incl. e-cycles)	23.6. ...walking	23.7. ...scooting (incl. e-scooters)	24. PARENT/CARER:Please indicate how frequently you make journeys by...	24.1. ...car/van	24.2. ...motorcycle/moped	24.3. ...bus/tram	24.4. ...train	24.5. ...cycling (incl. e-cycles)	24.6. ...walking	24.7. ...scooting (incl. e-scooters)	25. YOUNG PERSON:Please indicate how much you agree with the following statements:	25.1. Cycling is tiring	25.2. Cycling is efficient	25.3. Cycling on roads is stressful	25.4. Cycling on roads is convenient	25.5. Cycling is relaxing
1		2024-07-05 09:57:00					Male			Yes - as a child	1		Female										Yes	1		Yes	Yes		5	1	5	3	5	5	1		5	1	3	3	3	5	1		4	3	2	3	4
2		2024-07-05 12:56:00					Male			No	0		Female										Yes	1		Yes	Yes		5	2	4	3	6	6	1		5	1	2	3	3	6	1		2	5	2	2	4
3		2024-07-05 14:24:00					Female			Yes - as a child	1		Female										Yes	1		Yes	Yes		5	1	5	4	6	6	1		6	1	1	4	5	5	1		2	5	4	5	4
4		2024-07-05 17:54:00					Female			Yes - as a child	1		Female										No	0	I was offered the opportunity but did not want to do it	Yes	Yes		6	1	3	3	3	4	1		6	1	2	2	2	5	1		2	2	1	1	3
5		2024-07-08 16:57:00					Female			Yes - as a child	1		Male										No	0	It was not offered at my school	Yes	Yes		5	1	6	3	5	6	1		5	1	3	3	3	5	1		5	4	5	5	3
6		2024-07-09 15:03:00					Female			Yes - as a child	1		Male										Yes	1		Yes	Yes		5	1	4	3	6	6	2		6	1	5	4	1	5	1		4	4	2	3	3
7		2024-07-09 15:32:00					Female			Yes - as a child	1		Male										Yes	1		Yes	Yes		5	1	1	1	5	5	1		6	1	1	1	1	6	1		4	4	4	4	4
8		2024-07-09 15:41:00					Female			No	0		Female										No	0	It was not offered at my school	Yes	Yes		5	1	3	3	6	6	3		5	1	3	3	1	6	1		4	4	1	2	3
9		2024-07-09 18:10:00					Female			Yes - as a child	1		Female										Yes	1		Yes	Yes		5	1	1	2	4	6	5		5	1	1	3	3	5	1		4	4	2	2	3
10		2024-07-10 16:14:00					Female			Yes - as a child	1		Male										Yes	1		Yes	Yes		6	1	6	4	4	5	1		6	1	1	2	1	6	1		3	5	2	2	2
11		2024-07-11 11:46:00					Male			No	0		Female										No	0	I did not finish the course (e.g., due to injury, illness)	No	No		6	1	1	1	1	6	1		1	2	1	1	2	6	1		3	3	3	3	3
12		2024-07-11 12:34:00					Female			Yes - as a child	1		Female										No	0	It was not offered at my school	No	No		6	1	1	3	1	6	1		6	1	1	3	1	6	1		3	5	2	3	3
13		2024-07-11 14:25:00					Male			No	0		Female										No	0	It was not offered at my school	Yes	No		6	1	1	1	1	5	1		6	1	1	1	1	6	1		3	3	1	2	4
14		2024-07-11 15:36:00					Female			No	0		Male										No	0	It was not offered at my school	Yes	Yes		6	1	3	1	4	6	3		6	1	4	2	1	6	1		2	4	1	4	3
15		2024-07-11 16:18:00					Female			No	0		Male										No	0	It was not offered at my school	Yes	No		5	1	6	1	1	6	1		6	1	2	2	1	4	1		4	4	1	3	4
16		2024-07-11 16:42:00					Female			No	0		Male										No	0	I did not finish the course (e.g., due to injury, illness)	Yes	No		6	1	3	3	2	6	1		6	2	4	2	2	6	1		3	4	2	3	4
17		2024-07-11 16:53:00					Female			Yes - as an adult	0		Female										No	0	It was not offered at my school	No	No		6	1	5	1	1	6	1		6	1	5	1	1	6	1		3	4	1	3	3
18		2024-07-11 16:45:00					Female			No	0		Female										Yes	1		Yes	No		4	1	3	4	1	6	2		5	1	3	3	1	6	1		5	5	5	4	5
19		2024-07-11 17:56:00					Female			No	0		Female										No	0	It was not offered at my school	Yes	No		5	1	1	1	1	6	1		1	1	1	1	1	6	2		2	3	2	3	4
20		2024-07-11 17:59:00					Female			Yes - as an adult	0		Female										No	0	It was not offered at my school	Yes	No		5	2	5	3	2	6	2		5	3	5	4	3	6	3		4	3	4	3	3
21		2024-07-11 19:04:00					Female			Yes - as a child	1		Male										No	0	It was not offered at my school	Yes	Yes		6	1	4	4	5	6	1		6	3	3	4	3	4	1		4	5	2	4	4
22		2024-07-11 19:43:00					Female			No	0		Female										No	0	It was not offered at my school	Yes	Yes		6	1	4	4	1	6	1		6	1	1	1	1	6	1		3	3	3	3	3
23		2024-07-11 20:14:00					Male			No	0		Female										No	0	It was not offered at my school	Yes	No		4	1	4	2	3	6	4		6	1	4	3	1	6	1		2	3	1	3	1
24		2024-07-11 20:31:00					Female			No	0		Female										No	0	I was offered the opportunity but did not want to do it	No	No		6	1	1	1	1	3	1		6	1	1	1	1	1	1		2	1	2	2	1
25		2024-07-11 21:07:00					Female			No	0		Male										No	0	It was not offered at my school	Yes	No		6	1	3	4	2	5	1		6	1	3	4	1	6	1		4	4	2	3	4
26		2024-07-11 21:27:00					Female			No	0		Female										No	0	It was not offered at my school	No	No		5	1	5	4	1	6	1		4	1	5	1	1	6	1		3	3	3	4	3
27		2024-07-11 22:35:00					Male			Yes - as a child	1		Male										No	0	It was not offered at my school	Yes	No		5	1	5	1	5	6	4		5	1	6	1	3	6	1		4	5	2	3	5
28		2024-07-11 23:01:00					Female			Yes - as a child	1		Female										No	0	It was not offered at my school	Yes	No		6	1	1	1	1	5	1		6	1	6	6	1	6	1		4	4	4	4	4
29		2024-07-11 22:54:00					Female			No	0		Female										No	0	It was not offered at my school	Yes	No		4	1	5	4	5	6	4		4	1	6	4	4	6	3		1	4	3	3	5
30		2024-07-12 14:27:00					Female			No	0		Male										No	0	It was not offered at my school	Yes	No		5	1	3	1	2	6	2		6	1	3	1	1	6	1		4	5	4	4	4
31		2024-07-12 14:36:00					Male			Yes - as a child	1		Male										No	0	It was not offered at my school	Yes	Yes		6	1	2	2	6	3	1		6	1	2	2	2	4	1		4	5	3	2	5
32		2024-07-12 16:57:00					Female			Yes - as a child	1		Female										No	0	It was not offered at my school	Yes	Yes		3	1	6	4	3	6	2		2	1	5	4	1	6	1		2	4	4	4	4
33		2024-07-12 21:22:00					Female			Yes - as an adult	0		Male										No	0	I did not complete the course to the required standard	No	Yes		6	1	5	2	3	4	1		6	1	4	2	2	4	1		5	4	4	2	3
34		2024-07-13 08:19:00					Female			No	0		Male										No	0	It was not offered at my school	Yes	Yes		6	1	3	1	4	6	1		5	1	4	1	4	6	1		5	5	4	5	5
35		2024-07-13 10:09:00					Female			No	0		Male										No	0	It was not offered at my school	Yes	Yes		5	3	5	3	4	6	3		5	2	6	3	3	6	2		2	4	1	3	4
36		2024-07-13 11:31:00					Male			No	0		Male										No	0	It was not offered at my school	No	No		6	1	1	1	1	1	1		6	1	1	1	1	1	1		2	3	3	2	2
37		2024-07-13 11:59:00					Female			Yes - as a child	1		Male										Yes	1		Yes	Yes		6	1	4	3	5	5	3		5	1	3	3	4	6	1		2	4	2	3	4
38		2024-07-13 14:32:00					Male			No	0		Male										No	0	It was not offered at my school	Yes	No		4	1	6	1	1	5	1		5	1	6	1	1	5	1		3	4	2	4	5
39		2024-07-13 15:09:00					Female			No	0		Male										No	0	Other	Yes	Yes		6	1	4	3	2	4	1		6	1	4	3	1	3	1		4	4	5	4	4
40		2024-07-13 17:30:00					Female			Yes - as a child	1		Male										Yes	1		Yes	Yes		5	1	3	3	5	6	5		6	1	3	3	3	5	1		4	5	4	4	5
41		2024-07-14 06:48:00					Male			No	0		Female										Yes	1		Yes	No		6	1	3	3	3	5	3		6	1	3	4	1	3	1		4	5	3	4	5
42		2024-07-14 14:03:00					Female			Yes - as a child	1		Female										Yes	1		Yes	Yes		6	1	1	2	1	6	1		6	1	1	4	1	5	1		4	5	1	1	1
43		2024-07-14 20:09:00					Female			No	0		Female										No	0	I was offered the opportunity but did not want to do it	No	Yes		5	1	6	4	2	6	5		5	1	6	4	1	6	1		3	3	2	3	3
44		2024-07-14 20:00:00					Male			Yes - as a child	1		Female										Yes	1		Yes	No		6	1	4	3	2	6	1		6	1	6	6	1	6	1		3	4	2	2	4
45		2024-07-14 20:21:00					Male			Yes - as a child	1		Female										No	0	It was not offered at my school	Yes	No		6	1	5	4	2	6	2		6	1	6	6	1	6	1		3	4	2	4	3
46		2024-07-15 15:23:00					Prefer not to say			No	0		Prefer not to say										No	0	It was not offered at my school	Yes	No		5	1	3	3	2	6	2		5	1	3	3	1	6	1		4	5	2	3	3
47		2024-07-15 18:26:00					Female			No	0		Male										Yes	1		Yes	Yes		6	1	6	2	5	5	4		6	1	3	3	3	4	1		5	5	2	3	5
48		2024-07-18 16:39:00					Female			No	0		Male										Yes	1		Yes	Yes		6	1	1	1	6	6	1		6	1	1	1	1	6	1		4	5	2	3	5
49		2024-07-19 13:19:00					Female			Yes - as an adult	0		Male										Yes	1		Yes	Yes		6	1	5	4	5	5	1		6	1	1	4	4	5	1		4	4	2	3	4
50		2024-07-19 13:44:00					Female			No	0		Male										Yes	1		Yes	Yes		5	1	6	3	4	6	2		5	1	3	2	3	6	1		2	4	2	4	4
51		2024-07-19 14:09:00					Male			Yes - as a child	1		Female										Yes	1		Yes	Yes		5	1	3	3	5	6	5		6	1	3	4	3	6	1		4	5	2	4	4
52		2024-07-19 21:12:00					Female			No	0		Female										Yes	1		Yes	No		6	1	4	4	1	6	1		6	1	4	4	1	5	1		3	2	2	2	4
53		2024-07-20 09:52:00					Female			No	0		Female										Yes	1		Yes	Yes		5	1	6	3	4	6	4		6	1	3	4	1	6	1		4	4	2	3	4
54		2024-07-21 18:02:00					Female			No	0		Female										No	0	It was not offered at my school	Yes	No		5	1	5	1	1	6	1		5	1	5	1	1	6	1		2	3	2	3	3
55		2024-07-22 17:11:00					Female			No	0		Female										Yes	1		Yes	Yes		6	1	3	2	5	6	5		6	1	2	2	1	5	2		5	4	3	4	4
56		2024-09-20 17:10:00					Male			Yes - as an adult	0		Female										No	0	It was not offered at my school	Yes	Yes		6	1	4	3	3	5	1		6	1	1	1	3	6	1		5	5	5	3	4
57		2024-09-20 17:16:00					Female			No	0		Female										Yes	1		Yes	No		5	1	6	3	1	6	1		6	1	2	3	1	6	1		2	4	2	2	3
58		2024-09-21 01:43:00					Male			No	0		Female										No	0	It was not offered at my school	No	No		6	1	6	1	1	6	1		6	1	1	2		5	1		3	4	1	2	5
59		2024-09-21 10:25:00					Female			Yes - as a child	1		Male										Yes	1		Yes	Yes		3	1	3	3	6	6	6		6	1	3	3	4	6	3		2	5	2	4	4
60		2024-09-21 18:18:00					Male			Yes - as a child	1		Female										Yes	1		Yes	Yes		4	1	6	3	6	6	3		5	1	1	5	5	6	3		3	4	2	3	4
61		2024-09-21 21:57:00					Female			No	0		Female										No	0	It was not offered at my school	Yes	Yes		6	1	1	2	1	4	1		6	1	1	1	1	4	1		3	3	1	1	4
62		2024-09-22 15:48:00					Female			No	0		Female										Yes	1		Yes	Yes		6	1	4	3	4	6	1		6	1	3	3	1	6	1		2	4	2	2	4
63		2024-09-22 17:53:00					Female			No	0		Female										Yes	1		Yes	Yes		5	1	6	2	2	6	1		6	1	3	3	1	6	1		2	5	2	4	4
64		2024-09-23 15:37:00					Female			Yes - as a child	1		Female										Yes	1		Yes	Yes		5	1	6	3	5	6	1		5	1	5	3	5	6	1		3	4	1	3	4
65		2024-09-26 19:39:00					Female			No	0		Female										Yes	1		Yes	Yes		6	1	2	2	3	5	2		6	1	1	1	1	6	1		3	3	1	2	3
66		2024-09-27 17:38:00					Female			Yes - as a child	1		Male										Yes	1		Yes	No		5	1	3	2	2	6	1		5	1	4	4	1	6	1		3	4	3	3	3
67		2024-09-27 17:06:00					Female			Yes - as a child	1		Male										No	0	Other	Yes	No		5	1	5	3	1	6	1		5	1	4	3	1	6	1		2	3	1	3	2
68		2024-09-27 21:22:00					Female			No	0		Female										Yes	1		Yes	No		6	1	6	3	2	6	1		6	1	3	3	1	6	1		4	4	3	4	4
69		2024-09-27 22:08:00					Female			No	0		Female										No	0	It was not offered at my school	Yes	Yes		3	1	4	3	6	6	2		3	1	5	3	1	6	1		1	5	3	2	4
70		2024-09-28 13:58:00					Female			No	0		Male										No	0	Other	Yes	No		6	1	1	2	2	5	1		6	1	2	2	1	5	1		2	4	2	5	4
71		2024-09-28 18:41:00					Female			No	0		Female										No	0	Other	Yes	Yes		1	1	1	1	1	6	1		1	1	1	1	1	6	1		2	3	1	4	4
72		2024-09-29 19:32:00					Female			No	0		Male										No	0	It was not offered at my school	Yes	No		1	1	6	2	1	6	4		1	1	6	3	2	6	1		2	5	3	4	5
73		2024-10-01 16:10:00					Female			Yes - as an adult	0		Female										Yes	1		Yes	Yes		6	1	2	4	3	6	4		6	1	3	5	2	6	1		2	4	3	3	2
74		2024-10-01 18:14:00					Female			Yes - as a child	1		Male										Yes	1		Yes	Yes		5	1	2	4	5	6	3		5	1	3	3	5	6	1		4	5	4	4	4
75		2024-10-02 19:06:00					Female			No	0		Female										No	0	It was not offered at my school	No	No		5	1	6	4	1	6	2		5	1	5	3	1	6	1		4	4	2	2	3
76		2024-10-04 20:19:00					Male			No	0		Male										No	0	Other	Yes	Yes		6	1	3	3	3	5	1		6	1	4	3	2	4	1		3	4	4	4	4
77		2024-10-05 15:16:00					Male			Yes - as a child	1		Male										Yes	1		Yes	Yes		5	1	3	3	4	6	3		6	1	3	3	4	6	1		3	4	2	2	4
78		2024-10-04 19:16:00					Female			No	0		Male										No	0	I did not complete the course to the required standard	Yes	Yes		6	1	2	2	3	6	1		6	1	2	2	1	6	1		2	3	1	3	4
79		2024-10-07 09:51:00					Male			No	0		Female										No	0	It was not offered at my school	Yes	Yes		5	1	6	2	5	6	1		5	1	2	3	2	6	1		2	5	4	2	4
80		2024-10-07 16:12:00					Female			No	0		Female										Yes	1		Yes	Yes		5	1	3	3	4	6	3		6	1	3	3	1	5	2		3	4	1	2	4
81		2024-10-08 08:41:00					Female			No	0		Male										Yes	1		Yes	Yes		6	1	3	3	6	6	1		6	1	3	3	3	5	1		3	5	3	4	2
82		2024-10-08 08:51:00					Female			No	0		Male										No	0	It was not offered at my school	Yes	Yes		6	1	5	3	3	6	1		6	1	3	3	2	6	1		2	4	3	3	3
83		2024-10-08 08:59:00					Female			Yes - as a child	1		Female										Yes	1		Yes	Yes		6	1	5	2	3	6	4		6	1	5	2	2	6	1		4	4	1	2	3
84		2024-10-08 10:05:00					Female			Yes - as a child	1		Female										Yes	1		Yes	No		5	1	6	2	1	4	1		6	1	1	2	1	6	1		1	3	1	2	1
85		2024-10-08 10:13:00					Female			No	0		Female										No	0	Other	No	No		1	1	5	5	1	5	1		5	1	5	4	1	5	1		3	3	3	2	3
86		2024-10-08 11:14:00					Male			Yes - as a child	1		Male										Yes	1		Yes	Yes		5	1	5	3	4	5	4		6	1	4	1	5	6	1		2	4	1	3	2
87		2024-10-08 15:41:00					Female			No	0		Male										Yes	1		Yes	Yes		5	1	6	4	5	6	1		6	1	5	3	1	6	1		5	5	2	5	4
88		2024-10-08 16:03:00					Male			No	0		Male										Yes	1		Yes	No		5	1	3	3	1	6	1		5	1	3	3	1	5	1		3	4	2	4	2
89		2024-10-08 17:58:00					Male			Yes - as a child	1		Male										Yes	1		Yes	Yes		6	1	6	3	4	5	1		6	1	1	5	1	6	1		4	4	3	2	4
90		2024-10-08 18:08:00					Male			Yes - as an adult	0		Female										No	0	It was not offered at my school	Yes	No		5	1	3	3	1	6	1		5	1	3	3	6	5	1		2	4	2	3	4
91		2024-10-08 20:01:00					Female			Yes - as a child	1		Male										Yes	1		Yes	Yes		5	1	6	2	4	6	4		6	1	2	2	4	6	1		2	5	4	1	4
92		2024-10-08 22:40:00					Female			No	0		Female										No	0	It was not offered at my school	Yes	No		6	1	6	1	1	6	1		6	1	4	1	1	4	1		3	2	1	5	2
93		2024-10-09 06:12:00					Female			No	0		Female										Yes	1		Yes	Yes		5	1	6	1	1	5	1		6	1	1	4	1	4	1		2	4	1	2	1
94		2024-10-09 08:07:00					Female			Yes - as a child	1		Female										No	0	It was not offered at my school	Yes	No		5	4	6	5	5	6	6		4	4	6	5	5	6	5		5	5	5	5	5
95		2024-10-09 08:48:00					Female			No	0		Male										No	0	It was not offered at my school	Yes	No		5	1	3	6	1	6	1		5	1	2	2	1	6	1		4	4	2	4	4
96		2024-10-09 12:33:00					Female			No	0		Female										No	0	It was not offered at my school	Yes	Yes		4	2	6	4	5	6	2		4	2	6	4	5	6	2		4	5	2	4	5
97		2024-10-09 17:01:00					Female			Yes - as a child	1		Female										Yes	1		Yes	No		6	1	5	4	3	6	1		6	1	4	4	1	6	1		2	4	1	2	4
98		2024-10-09 18:34:00					Female			No	0		Male										No	0	It was not offered at my school	Yes	No		6	1	1	3	4	6	1		4	1	2	2	3	6	1		4	4	2	3	5
99		2024-10-10 05:13:00					Female			Yes - as a child	1		Male										Yes	1		Yes	Yes		6	1	6	1	5	6	1		6	1	1	1	3	6	1		5	2	4	4	4
100		2024-10-10 12:40:00					Male			Yes - as a child	1		Male										Yes	1		Yes	Yes		5	1	4	3	6	5	1		6	1	4	3	4	6	1		4	5	3	4	4
101		2024-10-10 13:19:00					Male			Yes - as a child	1		Male										No	0	Other	No	No		5	1	6	4	1	6	6		6	3	3	4	4	6	2		3	4	3	3	3
102		2024-10-10 16:51:00					Female			Yes - as a child	1		Female										No	0	It was not offered at my school	Yes	Yes		5	1	2	3	4	6	4		5	1	3	3	4	6	2		4	5	2	3	4
103		2024-10-10 21:07:00					Female			Yes - as a child	1		Male										No	0	It was not offered at my school	Yes	No		1	6	6	1	6	6	3		1	4	3	2	5	6	6		5	1	5	5	5
104		2024-10-11 14:48:00					Male			No	0		Male										No	0	It was not offered at my school	Yes	No				6								6						2	3	3	3	3
105		2024-10-11 15:23:00					Female			No	0		Female										No	0	It was not offered at my school	Yes	No		5	1	6	1	1	6	1		5	1	4	2	1	6	1		2	5	3	3	4
106		2024-10-12 05:57:00					Female			No	0		Male										Yes	1		Yes	Yes		6	1	1	3	5	6	1		6	1	3	4	1	6	1		4	4	2	3	4
107		2024-10-12 20:25:00					Female			Yes - as a child	1		Female				10		Frequently	Sometimes	Sometimes	Never	Yes	1		Yes	No		5	1	6	3	1	6	1		6	1	4	4	1	5	1		4	4	4	2	3
108		2024-10-08 15:56:00					Female			Yes - as a child	1		Female										No	0	I did not complete the course to the required standard	Yes	Yes		5	1	6	4	3	4	3		6	1	2	4	3	4	1		4	2	2	4	2
109		2024-10-18 13:49:00					Female			No	0		Non-binary										Yes	1		Yes	Yes		6	1	6	2	4	6	1		6	1	3	3	1	6	1		1	4	1	3	3
110		2024-10-18 15:11:00					Female			Yes - as a child	1		Female										Yes	1		Yes	Yes		6	5	2	4	1	6	1		6	1	2	3	1	4	1		2	3	2	3	2
111		2024-10-18 20:51:00					Male			Yes - as a child	1		Male										Yes	1		Yes	Yes		4	1	5	4	5	6	3		1	1	1	1	1	1	1		4	2	2	3	5
112		2024-10-19 17:34:00					Male			Yes - as a child	1		Male				4					Always	No	0	It was not offered at my school	Yes	Yes		5	1	6	3	6	6	1		6	1	4	4	4	6	1		4	4	1	4	3
113		2024-10-21 15:06:00					Male			No	0		Male										No	0	Other	Yes	No		1	2	1	1	1	1	1		6	1	1	1	1	5	1		4	4	3	4	3
114		2024-10-23 20:23:00					Male			Yes - as a child	1		Male										Yes	1		Yes	Yes		6	1	3	4	4	5	1		6	1	3	3	3	6	1		2	4	1	4	4
115		2024-10-24 10:16:00					Female			No	0		Female				5		Never	Frequently	Sometimes	Never	Yes	1		Yes	Yes		6	1	4	4	4	6	1		6	1	1	4	4	6	1		5	5	4	4	5
116		2024-10-24 14:39:00					Female			Yes - as a child	1		Female										Yes	1		Yes	Yes		5	1	3	3	2	6	5		5	1	2	3	1	6	1		4	4	1	2	3
117		2024-10-24 17:30:00					Female			No	0		Male										Yes	1		Yes	Yes		5	1	1	1	6	5	1		6	1	2	3	1	3	1		4	4	2	4	5
118		2024-10-30 07:24:00					Male			Yes - as a child	1		Male										Yes	1		Yes	Yes		6	4	1	5	5	6	4		6	4	1	3	4	6	1		3	4	4	3	4
119		2024-10-30 14:34:00					Female			Yes - as a child	1		Male										Yes	1		Yes	No		4	1	6	4	5	6	5		4	1	6	4	1	6	1		3	4	3	4	4
120		2024-11-06 20:41:00					Male			Yes - as an adult	0		Male										Yes	1		Yes	Yes		5	1	1	2	1	1	1		5	1	1	1	1	1	1		4	4	2	4	3
121		2024-11-07 23:13:00					Male			Yes - as an adult	0		Male										Yes	1		Yes	Yes		5	1	6	3	4	6	1		5	1	4	3	6	5	1		2	4	2	4	5
122		2024-11-08 08:42:00					Prefer not to say			No	0		Female				5		Never	Sometimes	Frequently	Frequently	No	0	It was not offered at my school	Yes	Yes		5	1	6	5	5	6	1		5	1	1	3	6	5	1		3	5	2	4	4
123		2024-11-08 14:06:00					Male			No	0		Male										No	0	It was not offered at my school	Yes	Yes		5	1	5	6	4	6	5		5	1	5	5	4	6	5		4	4	1	2	5
124		2024-11-11 14:52:00					Female			Yes - as a child	1		Female										Yes	1		Yes	Yes		5	1	3	3	3	6	3		5	1	3	5	3	6	1		4	4	2	3	3
125		2024-11-11 14:51:00					Female			No	0		Male				5		Sometimes	Sometimes	Never	Frequently	Yes	1		Yes	Yes		5	1	3	3	6	6	1		6	1	3	3	3	5	1		4	5	1	3	4
126		2024-11-11 15:41:00					Female			No	0		Female										Yes	1		Yes	Yes		6	1	3	3	3	4	1		6	1	1	3	3	6	1		2	4	1	2	2
127		2024-11-11 16:31:00					Female			No	0		Male										Yes	1		Yes	Yes		6	1	1	1	5	6	1		6	1	1	1	1	6	1		4	4	2	3	5
128		2024-11-11 16:50:00					Female			Yes - as a child	1		Male										Yes	1		Yes	Yes		5	1	3	3	5	6	3		6	1	6	3	1	6	1		2	4	3	2	2
129		2024-11-11 17:16:00					Female			No	0		Female										No	0	I was offered the opportunity but did not want to do it	Yes	Yes		6	1	1	3	3	4	3		6	1	1	3	1	4	1		2	5	1	4	2
130		2024-11-11 17:25:00					Prefer not to say			No	0		Prefer not to say										Yes	1		Yes	Yes		6	1	3	4	5	6	3		6	1	3	4	5	6	1		5	4	4	4	4
131		2024-11-11 18:19:00					Female			Yes - as a child	1		Male										No	0	I was offered the opportunity but did not want to do it	Yes	Yes		5	1	1	1	6	6	1		6	1	1	1	1	6	1		4	5	1	5	5
132		2024-11-11 19:09:00					Female			Yes - as a child	1		Male										Yes	1		Yes	Yes		6	1	2	3	6	5	1		5	1	4	3	2	4	1		3	5	4	2	4
133		2024-11-11 19:58:00					Male			No	0		Female										No	0	It was not offered at my school	Yes	Yes		5	1	5	4	4	5	1		5	1	4	5	5	5	1		2	5	2	2	4
134		2024-11-11 18:22:00					Female			No	0		Female										Yes	1		Yes	Yes		5	1	6	3	3	5	1		6	1	3	3	1	4	1		2	2	3	2	2
135		2024-11-11 20:30:00					Female			No	0		Male										Yes	1		Yes	Yes		6	1	6	3	4	5	1		6	1	1	3	2	6	1		4	4	2	3	4
136		2024-11-11 20:41:00					Female			No	0		Male										No	0	It was not offered at my school	Yes	Yes		5	1	6	3	4	5	4		6	1	2	3	2	6	1		2	5	2	4	4
137		2024-11-11 20:54:00					Female			No	0		Female										No	0	I was offered the opportunity but did not want to do it	Yes	Yes		6	1	2	2	4	5	4		6	1	2	3	1	5	1		2	4	3	3	4
138		2024-11-12 17:22:00					Female			Yes - as a child	1		Male										Yes	1		Yes	Yes		6	1	6	3	4	5	1		6	1	1	3	3	5	1		2	3	2	3	2
139		2024-11-12 17:20:00					Female			No	0		Female										No	0	It was not offered at my school	Yes	Yes		5	1	2	3	4	6	3		6	1	2	3	1	6	1		3	4	1	2	4
140		2024-11-13 08:26:00					Female			Yes - as a child	1		Female										No	0	It was not offered at my school	Yes	Yes		5	3	1	3	5	5	1		5	3	1	3	1	5	1		2	2	1	1	2
141		2024-11-13 11:43:00					Female			No	0		Female										No	0	It was not offered at my school	Yes	Yes		5	1	5	1	4	4	1		6	1	1	3	1	6	1		2	5	2	4	4
142		2024-11-13 13:12:00					Female			Yes - as a child	1		Male										Yes	1		Yes	Yes		6	1	3	3	4	6	4		6	1	3	3	3	6	1		2	3	2	2	3
143		2024-11-13 16:25:00					Male			No	0		Female										Yes	1		Yes	Yes		6	1	1	2	4	6	1		6	1	1	3	1	6	1		2	4	3	4	2
144		2024-11-13 16:44:00					Male			Yes - as a child	1		Female										No	0	It was not offered at my school	Yes	Yes		6	1	1	2	4	6	1		6	1	1	1	1	6	1		2	4	2	4	4
145		2024-11-13 19:54:00					Female			Yes - as a child	1		Female				2.5 hrs					Always	Yes	1		Yes	Yes		5	1	4	3	6	6	2		5	1	5	4	6	6	1		4	5	3	3	5
146		2024-11-13 23:50:00					Female			Yes - as a child	1		Female										Yes	1		Yes	Yes		6	1	1	3	4	6	4		6	1	1	4	3	6	1		4	4	2	4	4
147		2024-11-14 05:31:00					Female			Yes - as a child	1		Male										Yes	1		Yes	Yes		5	1	3	3	5	6	4		6	1	3	3	4	6	1		4	4	4	3	4
148		2024-11-14 11:44:00					Female			Yes - as a child	1		Female										Yes	1		Yes	Yes		5	1	3	3	3	6	3		5	1	3	3	3	6	1		4	5	1	4	4
149		2024-11-14 19:17:00					Female			No	0		Male										Yes	1		Yes	Yes		5	1	3	3	5	6	1		6	1	3	4	2	6	1		2	5	3	4	4
150		2024-11-15 08:05:00					Female			No	0		Male										Yes	1		Yes	Yes		6	1	4	4	3	6	2		5	1	1	2	3	5	1		4	5	2	2	3
151		2024-11-15 14:47:00					Female			Yes - as a child	1		Female										No	0	Other	Yes	Yes		4	1	4	4	3	6	3		3	1	4	5	1	6	1		3	4	2	3	3
152		2024-11-15 15:30:00					Male			No	0		Male										No	0	Other	Yes	Yes		6	1	5	3	4	6	1		6	1	3	3	3	6	1		2	4	2	2	2
153		2024-11-15 19:26:00					Female			No	0		Male										Yes	1		Yes	No		5	1	5	3	1	6	1		6	1	2	3	1	5	1		4	3	2	1	5
154		2024-11-15 20:16:00					Female			Yes - as a child	1		Male										No	0	I did not complete the course to the required standard	No	Yes		5	1	2	2	1	3	1		6	1	3	3	1	3	1		1	4	2	4	2
155		2024-11-15 22:07:00					Female			No	0		Male										No	0	I did not complete the course to the required standard	No	Yes		5	1	4	2	1	6	4		5	1	4	2	1	5	1		3	4	3	3	3
156		2024-11-16 06:40:00					Female			No	0		Female										Yes	1		Yes	Yes		6	2	2	1	5	5	1		6	1	3	4	3	6	1		1	4	1	3	3
157		2024-11-16 08:17:00					Female			Yes - as a child	1		Female										Yes	1		Yes	Yes		6	1	3	3	5	6	2		6	1	3	3	3	5	2		2	4	2	3	3
158		2024-11-16 17:19:00					Female			Yes - as a child	1		Male										No	0	It was not offered at my school	Yes	Yes		6	1	3	3	3	4	2		5	1	3	3	2	4	1		2	3	2	3	2
159		2024-11-17 13:35:00					Female			Yes - as a child	1		Male										Yes	1		Yes	No		5	1	2	2	1	6	1		6	1	2	3	1	6	1		2	4	1	2	3
160		2024-11-17 16:08:00					Male			Yes - as an adult	0		Female										Yes	1		Yes	Yes		6	1	4	1	1	1	1		6	2	1	1	2	1	1		4	4	3	3	2
161		2024-11-17 22:09:00					Female			No	0		Female										Yes	1		Yes	No		6	1	6	3	3	6	3		6	1	3	3	5	6	4		3	4	3	2	3
162		2024-11-17 22:33:00					Female			No	0		Male										No	0	It was not offered at my school	Yes	Yes		4	1	2	3	4	6	1		5	1	2	3	3	6	1		4	4	3	3	4
163		2024-11-18 09:37:00					Female			No	0		Male										Yes	1		Yes	Yes		5	1	4	3	4	6	4		5	1	4	3	1	6	1		4	4	2	3	4
164		2024-11-19 10:45:00					Female			No	0		Male										Yes	1		Yes	Yes		5	1	1	3	3	6	1		6	1	3	3	2	6	1		2	4	1	4	3
165		2024-11-19 11:23:00					Female			No	0		Male										Yes	1		Yes	No		4	1	4	3	2	6	1		5	1	3	3	1	6	1		2	4	2	3	2
166		2024-11-19 11:57:00					Male			Yes - as a child	1		Female										No	0	It was not offered at my school	Yes	Yes		6	1	1	4	5	6	1		6	1	1	5	5	6	1		5	5	2	4	5
167		2024-11-19 14:03:00					Female			No	0		Female										Yes	1		Yes	Yes		5	1	1	1	3	6	1		6	1	1	1	1	5	1		3	4	2	3	3
168		2024-11-19 17:37:00					Female			Yes - as a child	1		Female										Yes	1		Yes	Yes		5	1	5	2	5	5	1		6	1	1	1	5	5	1		5	4	4	4	4
169		2024-11-19 17:41:00					Female			No	0		Female										Yes	1		Yes	Yes		5	1	6	3	3	6	1		6	1	1	3	3	6	1		3	4	2	4	4
170		2024-11-19 20:38:00					Female			Yes - as a child	1		Female										Yes	1		Yes	Yes		6	1	3	3	3	5	1		6	1	3	3	1	5	1		4	3	1	1	4
171		2024-11-19 21:45:00					Female			Yes - as a child	1		Female										Yes	1		Yes	Yes		6	1	1	1	3	6	1		6	1	2	2	3	6	1		3	4	2	4	4
172		2024-11-20 16:34:00					Female			No	0		Male										Yes	1		Yes	Yes		5	1	6	3	5	6	1		6	1	1	3	5	6	1		5	4	4	2	4
173		2024-11-20 18:26:00					Female			Yes - as a child	1		Male										Yes	1		Yes	Yes		5	1	3	3	4	6	5		5	1	5	4	4	6	1		5	5	4	3	5
174		2024-11-20 19:36:00					Female			No	0		Female										Yes	1		Yes	Yes		5	1	1	2	3	6	3		5	1	1	3	3	6	3		4	4	4	3	4
175		2024-11-21 20:21:00					Female			Yes - as a child	1		Female										Yes	1		Yes	No		5	1	4	4	2	6	1		5	1	3	5	1	6	1		4	4	4	3	4
176		2024-11-22 12:56:00					Female			No	0		Male										Yes	1		Yes	Yes		5	1	1	3	6	6	5		6	1	1	3	4	6	1		5	5	2	2	5
177		2024-11-22 16:24:00					Female			No	0		Female										No	0	It was not offered at my school	Yes	Yes		5	1	6	3	4	5	1		6	1	1	4	1	6	1		2	3	2	2	1
178		2024-11-22 17:41:00					Female			Yes - as a child	1		Male										Yes	1		Yes	Yes		4	1	2	2	6	5	1		6	1	2	2	4	6	1		4	5	3	4	4
179		2024-11-22 18:09:00					Female			Yes - as a child	1		Female										Yes	1		Yes	Yes		5	1	3	1	5	5	1		6	3	3	1	3	6	1		5	5	1	4	4
180		2024-11-23 15:14:00					Female			No	0		Female										Yes	1		Yes	Yes		5	1	2	2	2	6	1		6	1	1	3	3	5	1		5	2	1	1	1
181		2024-11-24 06:43:00					Male			No	0		Male										Yes	1		Yes	Yes		5	4	3	3	6	6	3		6	4	3	3	3	6	1		2	4	2	4	4
182		2024-11-24 17:48:00					Female			No	0		Male										Yes	1		Yes	Yes		5	1	3	3	6	6	4		6	1	3	3	3	6	1		4	5	4	4	4
183		2024-11-25 17:15:00					Female			Yes - as a child	1		Female										No	0	It was not offered at my school	Yes	No		6	1	4	1	1	4	1		3	3	3	1	1	4	1		5	5	2	3	5
184		2024-11-26 20:09:00					Female			Yes - as a child	1		Male										Yes	1		Yes	Yes		5	1	3	4	4	6	2		6	1	3	4	4	5	1		3	5	4	4	5
185		2024-11-27 07:07:00					Female			No	0		Male										Yes	1		Yes	Yes		6	1	3	3	5	6	5		6	1	3	4	5	6	4		3	4	3	4	4
186		2024-11-27 14:50:00					Female			Yes - as a child	1		Female										Yes	1		Yes	Yes		5	1	6	1	5	6	4		5	1	1	1	3	5	1		4	4	3	4	4
187		2024-11-27 15:01:00					Female			Yes - as a child	1		Female										Yes	1		Yes	Yes		6	2	5	3	4	6	2		5	2	3	3	4	5	2		2	4	2	3	3
188		2024-11-27 19:52:00					Female			No	0		Male										Yes	1		Yes	Yes		5	1	6	3	4	6	3		5	1	2	3	1	6	1		2	4	1	3	1
189		2024-11-27 20:43:00					Male			No	0		Prefer not to say				40		Never	Always	Never	Never	No	0	It was not offered at my school	Yes	Yes		6	1	5	3	4	5	4		6	1	1	3	3	6	1		4	3	2	4	3
190		2024-11-29 16:20:00					Female			No	0		Female										No	0	Other	Yes	Yes		6	1	6	2	3	6	1		6	1	2	3	3	6	1		4	4	2	4	3
191		2024-12-01 11:19:00					Male			Yes - as a child	1		Female										Yes	1		Yes	Yes		5	1	3	3	6	5	1		5	4	3	3	4	6	1		4	4	1	3	4
192		2024-12-01 21:47:00					Female			Yes - as a child	1		Male										Yes	1		Yes	Yes		6	1	2	3	6	6	4		6	1	3	3	4	6	1		5	5	2	4	5
193		2024-12-02 17:48:00					Female			No	0		Female										No	0	It was not offered at my school	Yes	No		6	1	6	4	2	6	1		6	1	5	5	1	6	1		5	5	4	3	5
194		2024-12-02 17:25:00					Female			No	0		Female										No	0	It was not offered at my school	Yes	Yes		6	1	2	1	2	6	1		6	1	1	1	2	6	1		4	5	3	3	5
195		2024-12-02 18:13:00					Female			Yes - as a child	1		Male										Yes	1		Yes	Yes		5	1	3	4	6	6	3		6	1	4	4	5	6	1		5	5	5	5	5
196		2024-12-02 18:39:00					Female			Yes - as a child	1		Female										Yes	1		Yes	Yes		5	4	5	5	5	6	5		5	4	5	5	5	6	4		3	4	3	2	2
197		2024-12-02 19:34:00					Female			Yes - as a child	1		Female										No	0	It was not offered at my school	No	No		2	1	6	3	1	6	3		3	1	4	3	1	6	1		4	3	2	2	3
198		2024-12-05 08:12:00					Female			No	0		Male										Yes	1		Yes	No		5	1	5	4	3	5	3		6	1	4	4	1	6	1		5	4	3	3	4
199		2024-12-06 14:16:00					Female			No	0		Female										Yes	1		Yes	Yes		5	1	3	3	3	6	1		5	1	3	3	3	6	1		2	3	2	3	3
200		2024-12-06 19:42:00					Female			Yes - as an adult	0		Female										Yes	1		Yes	Yes		5	1	3	3	3	6	1		6	1	3	3	3	6	1		4	4	1	4	4
201		2024-12-06 22:31:00					Female			No	0		Male										No	0	It was not offered at my school	Yes	Yes		5	1	2	3	6	6	3		5	1	3	3	3	6	2		2	5	5	4	5
202		2024-12-08 20:55:00					Female			No	0		Female										No	0	It was not offered at my school	Yes	Yes		6	1	2	2	4	6	4		6	1	2	2	1	5	1		4	5	2	3	3
203		2024-12-15 09:03:00					Female			No	0		Female										No	0	I was offered the opportunity but did not want to do it	Yes	No		5	1	2	3	2	6	1		5	1	3	5	1	6	1		4	1	3	2	2
204		2024-12-17 18:50:00					Female			Yes - as an adult	0		Female										Yes	1		Yes	Yes		6	1	3	3	4	6	3		6	1	3	3	5	6	1		2	4	3	4	4
205		2024-12-19 00:49:00					Female			Yes - as a child	1		Female										Yes	1		Yes	Yes		6	1	2	3	4	6	1		6	1	2	3	3	6	1		2	3	2	4	4
						44.0441	159	21	7	83	83	12.8878	93	3	7	7	11.5		3				115	I was offered	7	190	146		5	190	33	36	43	4	119		6	186	55	35	96	5	183
MULTIVARIATE OUTLYING CASES REMOVED:	2,70,72,168					6.47336	43	176	191	12	122	1.64558	108	199	193	197	14.1244		1				90	Not offered	65	15	59		1	6	22	32	20	0	18		1	6	28	24	19	0	10
						43.5	0	8	7	110		13	1	3	5		5		1					Standard	5				3	2	47	93	33	3	28		4	6	65	92	44	4	5
						31	3					11	3				4		0					Ilness etc.	2				12	4	23	36	43	11	24		6	6	26	37	22	16	3
						66						18					40							Other	11				98	1	29	5	39	39	12		57	0	17	13	18	40	2
						One participant put year of birth: 1989																			90				85	1	51	2	26	147	3		130	0	14	3	4	139	1
						One datapoint (case #15) removed
[truncated: 75 more columns]
